# Supplementary material
Source: publisher site journal article supplement (https://www.spandidos-publications.com/6618/downloadSupplementary)
Supplement: Supplementary file 1 [file downloadSupplementary]

## Sheet: Sheet1
Table SIII. Differentially expressed genes, co-expression module genes and genes overlapping between them.
WGCNA gene	DEG	Overlapping gene
PCSK2	MMRN1	PCSK2
ZCCHC12	RASSF9	ZCCHC12
PRR15	GPC3	PRR15
SLIT1	LYVE1	SLIT1
CITED1	RYR2	CITED1
ECM1	PID1	ECM1
TESC	PLA2R1	TESC
THRSP	TCEAL5	THRSP
TMEM215	ADH1B	TMEM215
HPCAL4	LRP1B	HPCAL4
LRRK2	FAM180B	LRRK2
RXRG	ATP2C2	RXRG
KLHDC8A	PAPSS2	KLHDC8A
NAT8L	IPCEF1	NAT8L
TENM1	ZNF804B	TENM1
LRP4	C8orf88	LRP4
ADAMTS9	GPM6A	ADAMTS9
SCG5	AOX1	SCG5
HMGA2	TFF2	HMGA2
FRMD3	SCARA5	FRMD3
PLA2G12B	DPT	PLA2G12B
METTL7B	EPHA3	COL13A1
PDZRN4	PBX4	EYA2
PHEX	CHRDL1	PRDM1
COL13A1	DPP6	DIRAS3
EYA2	F10	ATP11A
PRDM1	DLG2	ENTPD1
DIRAS3	TPPP	UBE2QL1
ATP11A	LAYN	STK32A
ENTPD1	PLSCR4	FAM171A2
UBE2QL1	ZFPM2	SNX25
STK32A	KCNIP4	CARNS1
KLRG2	TBC1D4	NPC2
FAM171A2	MYOC	HEY2
VSTM4	LRIG1	HS6ST2
SV2A	PLCH1	LMO3
SNX25	TFF1	B3GNT7
SPRY1	CDH16	PLAG1
CARNS1	PROX1	CCND2
NPC2	LMOD1	GLT1D1
STXBP6	CSGALNACT1	LPAR1
HEY2	TFCP2L1	ST3GAL5
NCMAP	TLE4	NUAK2
HS6ST2	MAPK4	LRRC75A
TMEM108	TNS3	ETV5
CA11	TFF3	BMP1
PRR29	IGFBPL1	KLK4
LMO3	MATN2	IGF2BP2
TSPAN5	CFD	DLG4
CD44	AGR3	ARHGAP36
ITGA7	MAFB	MT1G
B3GNT7	ANK2	TPO
SFTA3	CCDC146	DCSTAMP
ST6GALNAC2	TMEM171	DIO1
PLAG1	PRKCQ	SFTPB
CCND2	CYTH3	KLK7
GLT1D1	EPHB1	CHI3L1
LPAR1	DGKI	SLC26A4-AS1
GPR132	WSCD2	CXCL14
SHISA6	SLC5A5	TMPRSS6
IKZF2	ODAM	TFF3
OIT3	OCA2	FN1
EDARADD	RNF150	B3GNT3
B4GALT6	RPS6KA6	SLPI
ST3GAL5	PDLIM3	LCN2
ZNF883	MPPED2	SLC34A2
NUAK2	SYNE1	CRLF1
KCNK5	TLE1	KLK10
PLD3	SH3RF1	CXCL17
ST3GAL5-AS1	MRO	TMPRSS4
SLC35F3	CCL21	CST6
LRRC75A	SMOC2	ALOX5
DHCR7	CLUL1	SYT12
TNIK	LIFR	SLC26A4
SSBP2	KHDRBS2	COMP
ORMDL3	GLT8D2	SLC27A6
ETV5	SRF	IGSF1
BMP1	STARD13	SFN
STON2	WDR72	TACSTD2
PTPRG	DNAJB4	CLDN16
TYRO3	FHDC1	NMU
VWA7	RASSF6	TCEAL2
ZSWIM5	PI16	PLAU
CHN2	NCS1	SLC26A7
TRIM45	CWH43	OTOS
ESYT3	PKHD1L1	KCNN4
MERTK	BCL2	CLDN10
KLK4	ANGPTL1	MT1F
IGF2BP2	GDF10	SPOCK2
TMEM243	TNFRSF11B	FAM167A
IKBKE	KCNK2	GDF15
SGCB	ITPR1	MUC1
ST6GALNAC6	CTH	EDN3
CAMK1	CYP7B1	NELL2
KLK1	WWOX	MT1H
RNF146	FTCDNL1	CYP1B1
DLG4	ACACB	ALOX15B
LDOC1	CLCNKB	MGAT3
ABCC6	CAMK1D	COL23A1
FOXP4	STXBP5L	FABP4
LRP4-AS1	ARHGAP6	BEX1
LINC00900	SEMA3D	SLC5A8
MBIP	USP54	LAMB3
FAM110C	KIT	C19orf33
STX2	DEPTOR	FHL1
NOVA1	PRKX	LAMP5
UCHL5	OGN	CA4
RHOBTB2	CITED2	TNC
NT5C1A	ZFP36L2	IGFBP6
NCDN	ID4	GABRB2
ARHGAP36	SORBS2	CD55
MT1G	AVPR1A	DUSP5
TPO	NUAK2	CCL13
DCSTAMP	SLC4A4	STRA6
DIO1	PRPS1	KCNAB1
SFTPB	PODN	SYTL5
KLK7	PAK3	NFE2L3
CHI3L1	NUGGC	CBLN1
SLC26A4-AS1	FMOD	PROS1
CXCL14	AIF1L	RAMP1
TMPRSS6	LPAR1	CAMK2N1
TFF3	TMEM164	CYP2S1
FN1	PRTG	SCEL
B3GNT3	ADD3	FAM20A
SLPI	SPX	KRT19
LCN2	ABI3BP	AGR2
SLC34A2	SLC25A25	MYO1G
CRLF1	ELMO1	SLC22A31
KLK10	SLC5A8	SERPINA1
CXCL17	RGS8	SOD3
TMPRSS4	TMEM220	MUC21
CST6	APOD	GABBR2
ALOX5	SLC26A7	ITGA2
SYT12	COL23A1	HGD
SLC26A4	SYTL3	TMEM163
COMP	EFEMP1	TMEM100
SLC27A6	SMAD9	C16orf89
IGSF1	BMP2	DTX4
SFN	ARHGAP24	CTXN1
TACSTD2	PPARGC1A	SLC30A2
CLDN16	CPQ	CTSC
NMU	MFAP4	RSPO4
TCEAL2	LINGO2	IQGAP2
PLAU	WASF3	NCAM1
SLC26A7	ZMAT4	WNT10A
OTOS	WNT11	HLA-G
KCNN4	TOB1	DPP4
CLDN10	FOXJ1	CYSLTR2
MT1F	LINC00092	MDK
SPOCK2	HBB	NGEF
FAM167A	BMP8A	PRSS23
GDF15	GLUL	KCNJ2
MUC1	CDON	MMP7
EDN3	TP53INP2	KRT17
NELL2	FRAS1	MISP
MT1H	RGS16	NUPR1
CYP1B1	FGL2	COL8A2
ALOX15B	FBLN7	SPOCK1
MGAT3	MAMDC2	OGDHL
COL23A1	FBLN5	ELF3
FABP4	FGFR2	AQP4
BEX1	WFS1	AHNAK2
SLC5A8	LTF	ABHD11-AS1
LAMB3	TUB	KRT80
C19orf33	IRS1	LGI3
FHL1	CDC42EP2	BAIAP3
LAMP5	JUN	PPP1R1B
CA4	TMEM139	PLAUR
TNC	CYBRD1	SLC4A4
IGFBP6	UPK3A	MET
GABRB2	DCN	PDE5A
CD55	TCEAL2	DIO2
DUSP5	CENPJ	LRG1
CCL13	HGD	HBA2
CPAMD8	SYNDIG1	VSTM2L
STRA6	MIR22HG	ISM1
KCNAB1	IP6K3	GJB3
SYTL5	RAP1GAP	MT1M
NFE2L3	FBLN1	HLF
CBLN1	FHL1	PDLIM4
PROS1	SDC2	ST6GALNAC5
RAMP1	NCAM1	TSC22D1
CAMK2N1	SELENBP1	PNP
FAM155B	ROR2	EBF4
CYP2S1	FAXDC2	CTSH
SCEL	HSPB6	FOXQ1
FAM20A	KLF9	ICAM1
KRT19	CRABP1	ARMCX3
AGR2	SESN3	ICAM5
MYO1G	TMOD1	PLXNC1
SLC22A31	EGR2	INHBB
SERPINA1	IER2	CLDN2
NGFR	SOD3	ERP27
SOD3	MAN1A1	PGF
MUC21	SRPX	KCNQ3
GABBR2	IMPA2	EVA1A
ITGA2	LONRF3	PKNOX2
HGD	DES	MT1E
S100A10	GRIN2C	TRPC5
TMEM163	HBA2	GNA14
TMEM100	SLC39A14	S100A6
C16orf89	SLC26A4	IGFL2
DTX4	SUCNR1	SDC4
CTXN1	PLA2G7	SLC1A5
SLC30A2	FOXA2	FAM43A
CTSC	OMD	SAMD11
PEBP4	SLC25A15	PERP
RSPO4	CRYAB	ABTB2
TM4SF1	PLEKHH1	LY6E
IQGAP2	BEX1	NOD1
NCAM1	DIO2	GAP43
WNT10A	FCGBP	GGCT
HLA-G	TPO	RASD2
DPP4	MTCH1	DOK7
CYSLTR2	PFKFB2	ITPR1
MDK	SNAI1	FSTL3
NGEF	SORD	ITGB4
PRSS23	LRRC2	PRR15L
KCNJ2	SCUBE3	MFAP2
MMP7	ZBTB16	CFI
KRT17	MIOX	TNFRSF21
MISP	LRP2	QPCT
HHATL	KCNQ1	ALDH1A1
NUPR1	LGMN	EPHB3
COL8A2	CAPN6	PELI1
SPOCK1	ANTXR1	SDK1
S100A4	HLF	TM4SF4
OGDHL	SLC16A2	MT1X
ELF3	GPR83	LIPG
CD22	OGDHL	TIMP1
AQP4	STX11	CLDN1
AHNAK2	ALDH1A1	UPP1
ABHD11-AS1	FHL2	PTPRE
KRT80	CD24	ALDH1A3
INMT	DNALI1	BNIPL
LGI3	CPXM1	SPX
BAIAP3	TCF7L1	TMEM79
PPP1R1B	AKAP12	ELMO1
PLAUR	PKNOX2	ESPN
SLC4A4	GSTM3	SSX1
S100A2	GNA14	LONRF2
MET	ITM2A	SEL1L3
NT5E	INAFM2	FCGBP
PDE5A	FAM167A	NRP2
DIO2	KIF12	AMIGO2
LRG1	TDRD9	MRC2
HBA2	IL33	GATM
VSTM2L	ARL4D	SORBS2
ISM1	ALDH1B1	C1orf116
GJB3	SERTM1	LAD1
MT1M	EGR1	IL1RAP
PALM3	FIBIN	MIR31HG
HLF	PKIA	PPARGC1A
PDLIM4	LINC01571	C1QL1
ST6GALNAC5	TRIM58	RDH5
TSC22D1	FOSB	NR2F1-AS1
PNP	CRELD2	CGNL1
DUOXA2	FABP4	TGFBR1
DMRT3	DIO1	TBC1D2
EBF4	PPP1R15A	ITGA3
CTSH	ID3	UNC5CL
FOXQ1	RCAN1	BHLHE40
ICAM1	MT1F	PALM
ARMCX3	IQGAP2	ETNK2
ICAM5	HYOU1	LIPH
PLXNC1	OTOS	LINC01571
INHBB	SGPP2	XKRX
IL1RN	MT1M	PLCD3
CLDN2	SNTA1	TCF7L1
ERP27	ENPP1	MAMLD1
PGF	SLC29A4	BRINP1
KCNQ3	ISM1	CEACAM6
ARNTL	GATM	MFGE8
EVA1A	HKDC1	LURAP1L
PKNOX2	GJB6	ERBB3
CFH	EYA2	ADM2
MT1E	RIMS4	CDH4
TRPC5	SGCD	CDH6
GNA14	CXCL12	LDHD
CXCL8	UST	DUSP6
S100A6	FLRT1	TIAM1
IGFL2	CALR	CHST2
SDC4	DUSP1	SOX4
SLC1A5	C7	TNFRSF12A
FAM43A	NR4A1	SLC16A2
SAMD11	KCNIP3	MXRA8
IL1RL1	RAG2	MIOX
PERP	PRR15L	GRIN2C
CDO1	ADM2	SPTBN2
ABTB2	FOS	RGS16
LY6E	PTCSC3	INF2
NOD1	HSD11B2	CDH3
GAP43	MT1G	KLK11
GGCT	FBLN2	CDC42EP3
OLFM2	SLC1A1	DHRS3
CLU	RGS2	RIMS4
RASD2	MT1H	GRB7
DOK7	LGI3	COL8A1
ITPR1	GBP1	TMEM92
FSTL3	KLK4	B4GALNT3
ITGB4	CA4	QSOX1
PRR15L	SLC26A4-AS1	CLIP3
MFAP2	C1S	PLEKHA4
CFI	PLAC9	HSD11B2
TNFRSF21	NR4A3	RUNX1
QPCT	MYADM	TRIM29
ALDH1A1	GLDC	GSTM3
EPHB3	IYD	ID3
PELI1	CGNL1	CDON
SDK1	CUX2	WSCD2
ST6GAL1	AQP4	LEMD1
PDE8B	EDN3	CD109
TM4SF4	TMEM119	SHROOM4
MT1X	FOLR1	ARHGAP24
LIPG	TG	NAPSA
CYP4B1	MT1A	TREM1
TIMP1	LDHD	VASN
CLDN1	GPX3	ULBP2
TCERG1L	HSPB8	PDE4C
UPP1	NUPR1	MPZL2
PTPRE	CRYBG3	DRAM1
ALDH1A3	GJA1	PLEKHN1
BNIPL	LIPG	PTCHD4
LDLR	CKB	PC
LOX	HSD17B6	CALR
TMEM178B	CLDN8	CKB
SPX	KLF6	IVL
TMEM79	HTRA3	GRHL3
AL157871.2	PCP4	KCNIP3
ELMO1	EGR3	DAPK2
ESPN	CHCHD10	PRSS22
SSX1	C1R	ENDOD1
LONRF2	MT1X	LGALS3
CD36	SLC43A3	ETHE1
SEL1L3	CARTPT	ITM2A
FCGBP	CLCNKA	RUNX2
FGFBP1	PGF	LPAR5
SCARA3	EBF4	ALDH3B1
NRP2	ARC	CACNG4
AMIGO2	C16orf89	CDKN1A
MRC2	GADD45B	FOXA2
HCG22	SERPINF1	ANXA1
SNX22	GPR183	TGFA
GATM	ZFP36	SNTA1
SORBS2	COL9A3	TMEM59L
C1orf116	ATF3	TPD52L1
LAD1	MT1E	DNALI1
IL1RAP	KCNAB1	NPTXR
MIR31HG	RRAD	EPS8
PPARGC1A	PTGDS	HRH1
BASP1	CCL19	MPPED2
C1QL1	FDCSP	SELENBP1
MAG	SFRP2	FAXDC2
DEPDC1B	LUM	CST2
RDH5	ETV4	ABCC3
ANGPTL4	MTRNR2L11	ENTPD2
NR2F1-AS1	LINC01496	CWH43
MEDAG	MTRNR2L13	TNFRSF10C
BTBD11	LINC01392	B3GAT1
CGNL1	LINC01264	CLCNKB
TGFBR1	LINC01335	MIR22HG
TBC1D2	LINC00502	FRMD5
ITGA3	LINC01248	COL9A3
UNC5CL	TMEM212-AS1	UST
BHLHE40	LINC00556	CDC42EP1
SORCS2	LINC00945	PDE9A
ID1	DSCAM-IT1	RYR1
SDF2L1	PCYT1B-AS1	LCN6
PTPRU	NPS	SDC3
AC068138.1	KRTAP23-1	GALNT7
SCNN1A	LINC01173	ARL4D
PALM	MIR3179-3	CRELD2
ETNK2	KRTAP19-6	CDKN2B
LIPH	LINC00400	SLC35F2
LINC01571	LINC01243	S100A11
XKRX	OPCML-IT2	PSD3
PLCD3	KRTAP22-2	LGMN
PSAT1	LINC00458	UNC5B
TCF7L1	LINC00352	NRCAM
MAMLD1	LINC00845	KCNQ1
BRINP1	TRPC7-AS2	TUSC3
CEACAM6	SPINT4	SPINT1
MFGE8	LINC00351	MVP
LURAP1L	KRTAP6-2	BID
ERBB3	TRMT2B-AS1	INAFM2
ADM2	LINC00686	CCND1
CDH4	DEFB135	RAB27A
STAC	ZNF385D-AS2	ECE1
CDH6	LINC01049	SYNDIG1
DPYSL3	LINC01205	FOXJ1
LDHD	LINC00362	MTMR11
DUSP6	KRTAP20-3	WFS1
TIAM1	LINC00474	ARHGAP23
CHST2	LINC00273	CX3CL1
NRIP1	LINC00290	GPRC5B
SOX4	LINC01288	ZMAT3
TNFRSF12A	DEFB133	TP53INP2
SLC16A2	WFDC9	CAMK1D
SULT2B1	S100A7L2	C2CD4A
TIPARP	MAGEB5	FAXC
MXRA8	OR4C5	PBX4
MIOX	LINC01195	NAB2
GRIN2C	LINC01256	EVPL
SPTBN2	VWC2L-IT1	SIPA1L2
RASGRF1	LINC00363	SYNE1
RGS16	LINC01162	CDC42EP2
INF2	DEFB115	C11orf80
CDH3	LINC00903	GPR83
KLK11	LINC00433	CORO2A
FLRT3	F8A2	SEMA3D
GBP3	LINC01438	SYTL3
CDC42EP3	LINC00587	FBLN7
EMID1	TTTY13	TMEM220
PMAIP1	TTTY20	KLK6
DHRS3	FRMPD4-AS1	ZMAT4
RIMS4	LINC01217	EDA2R
GRB7	LINC01327	BMP8A
KCNK15	KRTAP6-3	WWOX
LY6G6C	LINC01218	ACACB
COL8A1	KRTAP20-4	ABR
TMEM92	OR5I1	CLCNKA
B4GALNT3	TMEM212-IT1	SLC29A4
INPP5J	LINC01432	MTHFD1L
QSOX1	LINC00411	RNF150
CLIP3	LINC00383	RNF24
PLEKHA4	LINC00317	MRO
IGSF3	DEFB114	-
HSD11B2	PISRT1	-
TSPAN7	FANK1-AS1	-
FAM107A	LINC00308	-
MACC1	OR52E2	-
EPHA10	LINC01427	-
RUNX1	KRTAP21-3	-
TRIM29	TTTY22	-
GSTM3	LINC00430	-
ID3	LINC01017	-
CDON	DAOA-AS1	-
TMPRSS2	DEFB105B	-
HSPB7	KRTAP25-1	-
WSCD2	LINC00331	-
EHF	DPP10-AS2	-
LEMD1	LINC00613	-
PRICKLE1	DMD-AS3	-
OR2W3	LCE3B	-
SCGB2A1	MIR3180-2	-
SYT13	LINC01109	-
QPRT	DEFB103B	-
CD109	TTTY3B	-
SHROOM4	TRIM64	-
EDA	LINC00408	-
CRYGN	DEFB103A	-
MLXIPL	TTTY7	-
ARHGAP24	FAM197Y5	-
NQO1	TTTY7B	-
NAPSA	LINC00508	-
PTGS2	USP17L5	-
TREM1	HNRNPCL3	-
VASN	LINC00428	-
ULBP2	OR2AP1	-
LTBP1	LEUTX	-
PDE4C	LINC01039	-
MPZL2	MIR3180-3	-
NXN	LINC01386	-
DRAM1	LINC01339	-
ITGB6	CDH23-AS1	-
PLEKHN1	LINC01455	-
PLEKHA6	LINC00972	-
PTCHD4	DSCR4-IT1	-
GPER1	LCE3C	-
C4A	PRORY	-
PC	LINC01075	-
CALR	LINC00489	-
CKB	KRTAP19-7	-
IVL	LINC00297	-
GRHL3	LINC00676	-
SLC7A2	PCDH9-AS2	-
OSMR	LINC01035	-
KCNIP3	TRIM64C	-
WDR86-AS1	MORC1-AS1	-
DAPK2	GACAT1	-
PRSS22	KRTAP20-1	-
ARHGEF38	LINC01078	-
MICAL2	GIMD1	-
ENDOD1	DAOA	-
C4B	LINC00111	-
LGALS3	LINC01221	-
COPZ2	LINC00380	-
HRK	LINC00280	-
VEGFA	LINC01428	-
ETHE1	NANOGNB	-
MT2A	LINC01425	-
RCAN2	BSPH1	-
MMP16	EGLN3-AS1	-
C2CD4B	DEFB105A	-
SLC2A3	C11orf40	-
CATSPER1	PLS1-AS1	-
ITM2A	NMS	-
RUNX2	SMAD1-AS1	-
C1orf115	LINC00459	-
LPAR5	NDFIP2-AS1	-
TMEM98	MIR3180-1	-
KCP	CDRT7	-
MAOB	MTRNR2L9	-
ALDH3B1	P4HA2	-
ANXA3	SERINC2	-
ANXA2	PTP4A3	-
CACNG4	ARMC2-AS1	-
CDKN1A	PHLDA3	-
HMGA1	ABR	-
SIGLEC15	GOLT1A	-
FOXA2	BBC3	-
ANXA1	PLXND1	-
MMP15	LIPH	-
ACBD7	GALE	-
TGFA	STK32A	-
AMOT	KLHDC8A	-
SNTA1	SHROOM4	-
TMEM59L	ZMAT3	-
TPD52L1	LRP4	-
DNALI1	NPC2	-
NPTXR	RNF24	-
TSPAN33	ENTPD1	-
EPS8	CDH3	-
HRH1	TUSC3	-
MPPED2	BMP1	-
SELENBP1	NRCAM	-
GOLGA7B	SAMD1	-
PBX3	ETV5	-
TMSB4X	PRR36	-
FAXDC2	RXRG	-
SGK1	DLG4	-
SLC25A29	UNC5B	-
DSC2	MTHFD1L	-
VAV3	JAG2	-
CST2	TRIM47	-
ABCC3	GLT1D1	-
GSN	SRCIN1	-
ELOVL7	PTCHD4	-
ENTPD2	DDB2	-
CLIC5	GALNT7	-
CWH43	TNFRSF10C	-
MAP2	MAP3K6	-
CEBPA	BID	-
MST1R	TGFA	-
DGAT2	TMC6	-
TNFRSF10C	MPZL2	-
B3GAT1	HEY2	-
CLCNKB	ADORA1	-
AC034243.1	PLEKHN1	-
ALDH2	FHOD1	-
TGM1	SEMA3F	-
FAS	CCND1	-
ADTRP	MANEAL	-
SPHK1	NPDC1	-
MIR22HG	EPS8	-
FRMD5	LPAR5	-
PDE7B	PRR15	-
COL9A3	TGFB1	-
UST	DUSP4	-
EPHX4	GDF15	-
PAPLN	SCN1B	-
CDC42EP1	ARHGAP23	-
PDE9A	SYTL1	-
SEC14L2	PLCD3	-
GALNT10	DPP4	-
ESAM	B3GNT7	-
HES1	ZCCHC12	-
PRKG1	C11orf80	-
LAMC2	LAD1	-
RYR1	QPCT	-
CREB5	XPR1	-
LCN6	DYSF	-
FAM20C	E2F1	-
SDC3	FAXC	-
TMEM47	LRRC75A	-
SERTAD4-AS1	CORO2A	-
GALNT7	SLC22A31	-
MUC20	GGCT	-
SNAP25	RAPGEF5	-
MAFF	UBE2QL1	-
MANF	ECE1	-
ARL4D	ABCC3	-
BMP4	EDA2R	-
ATP6V0E2	ALDH3B1	-
LYNX1	RASD2	-
DAAM2	LRRK2	-
CRELD2	TIAM1	-
UCP2	MTMR11	-
FBN3	CITED1	-
SLIT2	SPINT1	-
CDKN2B	SCEL	-
MBOAT2	PSD3	-
SLC35F2	GABRD	-
KCTD17	FJX1	-
S100A11	NGEF	-
PSD3	COL13A1	-
KCNK3	GRB7	-
LGMN	ULBP2	-
TMEM184A	CDA	-
CTSB	TENM1	-
SUSD4	CTXN1	-
DMD	RYR1	-
ARHGAP19	PDE9A	-
UNC5B	TPD52L1	-
CXXC4	GJB3	-
NRCAM	PROS1	-
KCNQ1	CDKN2B	-
SAMD4A	EDIL3	-
VLDLR	GABRB2	-
SH3BGR	SEMA6B	-
BCL2L1	ADRA1B	-
LIF	B3GNT8	-
PLEKHG4	CLDN16	-
SLC25A42	THRSP	-
STMN3	CLDN1	-
TUSC3	HMGA2	-
SLA	SIPA1L2	-
DUOX1	EPHB3	-
HHEX	SLC35F2	-
SYPL2	RUNX1	-
FREM2	LOXL2	-
SPINT1	ICAM5	-
MVP	AMIGO2	-
PDLIM1	PDLIM7	-
FTH1	AGR2	-
KRT15	MRC2	-
BID	DUSP6	-
FIBCD1	RMI2	-
KCNS3	UPP1	-
SLCO4A1	S100A11	-
HK2	MFGE8	-
TFAP2C	SREBF1	-
ARSJ	CDT1	-
INAFM2	FAM43A	-
SOWAHA	CDH6	-
CCND1	IER5L	-
RAB27A	GPRC5B	-
NUDT11	TMEM79	-
ECE1	CHST2	-
CAPSL	B3GAT1	-
WTIP	SPTBN2	-
SSC4D	TBC1D2	-
SYNDIG1	FXYD5	-
RSPH6A	NAT8L	-
TMEM130	ST3GAL5	-
FOXJ1	KCNJ2	-
DST	SPRY4	-
SLC6A12	KDELR3	-
TTC39B	ISYNA1	-
MTMR11	CX3CL1	-
AL450992.2	NPTXR	-
PFKFB3	PDE4C	-
WFS1	LAMB3	-
TRNP1	KCNQ3	-
SLC9A3R1	CNFN	-
GAL3ST3	MAMLD1	-
ARHGAP23	ABTB2	-
FBXO32	CAMK2N1	-
RGN	INF2	-
PTK2B	MIR181A2HG	-
RNF212	ADAMTS9	-
IL17RD	PLAG1	-
STEAP4	SYTL5	-
EPHA2	EVPL	-
CST5	MVP	-
STRADB	NAB2	-
NAMPT	GPR4	-
BAG3	MET	-
CHPT1	NRP2	-
RNF144A	MROH6	-
C17orf107	GJA4	-
RND1	FN1	-
CX3CL1	TESC	-
TUBA1A	AK1	-
LAMA1	DTX4	-
LLGL1	FRMD3	-
DPY19L1	HIGD1B	-
ST8SIA4	PC	-
KCTD8	ASF1B	-
GPRC5B	SERPINA1	-
ARMCX6	LPL	-
ZMAT3	RAB27A	-
MTUS1	BAIAP3	-
CST4	SEZ6L2	-
KCNJ2-AS1	HRH1	-
CDH22	NOD1	-
GABRB3	GRHL3	-
TP53INP2	ITGA2	-
ACSF2	IGSF1	-
RND2	EMILIN2	-
DPY19L2	NID1	-
EMP2	CCND2	-
GCSH	KLK10	-
CKMT2	SDC4	-
STAM	CTSH	-
CLCF1	VWA1	-
PI4K2A	LRG1	-
SLC24A3	NR1D1	-
SULT1C2	F2R	-
PNPLA5	IL1RAP	-
CAMK1D	QSOX1	-
FRMD4B	CDC42EP1	-
CORO2B	CFI	-
UGT8	CLDN9	-
C2CD4A	PTPRE	-
S100A16	MDK	-
THEMIS2	PHYHIP	-
CDK5RAP2	LEMD1	-
CCL20	HES6	-
PRKACB	SDC3	-
FAM189A1	TK1	-
FAXC	DOCK9	-
SULF2	TNFRSF12A	-
AXIN2	PRDM1	-
GPD1L	UNC5CL	-
PBX4	CMTM3	-
PHLDB2	XKRX	-
GPR153	FNDC4	-
ENC1	FAM171A2	-
NAB2	CYP2S1	-
EVPL	STRA6	-
TPST2	CLIP3	-
SLC20A1	B4GALNT3	-
BEAN1	PLXNC1	-
FZD8	NR2F1-AS1	-
ADAMTS5	PDLIM4	-
RASGEF1B	MDFI	-
GLRB	TGFBR1	-
SIPA1L2	SOX4	-
PHYH	ADM	-
DLC1	B3GNT3	-
NUCB2	CYSLTR2	-
ABCA8	CD164L2	-
SYNE1	IGF2BP2	-
CDC42BPG	MCAM	-
KATNAL2	DOK7	-
C1orf226	SYT12	-
ANO6	DIRAS3	-
CCNA1	ENDOD1	-
TPMT	ALDH1A3	-
SLC15A2	RDH5	-
CDC42EP2	PRSS23	-
THEM5	SLIT1	-
DDIT3	PLAU	-
BCAP29	TIMP1	-
SMIM3	EVA1A	-
RARB	C4orf48	-
LINC01423	ITGA3	-
KLF15	PCSK1N	-
CLDN3	PDE5A	-
C11orf80	DRAM1	-
GPR83	SNX25	-
SYN1	PPP1R1B	-
CORO2A	PHLDA2	-
PMEPA1	SLC34A2	-
SFRP1	PDZK1IP1	-
SEMA3D	UCN	-
C10orf55	TMPRSS6	-
MGAT4B	PRSS22	-
SLC27A2	LGALS3	-
SYTL3	HPCAL4	-
PAM	RUNX2	-
NEXN	ETHE1	-
HIRA	CDH2	-
ST6GAL2-IT1	UNC5B-AS1	-
SYNM	S100A1	-
RHOBTB3	ICAM1	-
SPECC1	LMO3	-
DOK5	MGAT3	-
GNAS	TMPRSS4	-
TMEM43	S100A5	-
LENG9	SCG5	-
NAV2	REN	-
RGS4	COL8A1	-
PLK3	TNFRSF21	-
GNAI1	DCSTAMP	-
IGSF9	AHNAK2	-
AC005083.1	NFE2L3	-
GLS	CSF2	-
WNT5A	LONRF2	-
GATA3	LCN2	-
IL22RA1	APLNR	-
CD151	IGFBP2	-
DLX3	KCNN4	-
PPM1L	GABBR2	-
IL11RA	CARNS1	-
TRIM63	KRT80	-
MED13	PERP	-
PLEKHB1	SFN	-
TRPC6	CTSC	-
IL18R1	CDC42EP5	-
DUSP8	TGFBI	-
GPAM	KLK7	-
FBLN7	ATP11A	-
CRLF2	PALM	-
MEX3D	FAM20A	-
ARHGEF40	SRL	-
LTBP3	HES4	-
SYBU	VSTM2L	-
SUSD1	ALOX15B	-
CPNE4	SPINK2	-
ACTN1	MIR31HG	-
ARRDC4	MFAP2	-
IRS2	ITGB4	-
ZNF114	ESM1	-
LRRN2	CDC42EP3	-
CYP26B1	SLC1A5	-
PRPH2	ARHGAP36	-
TMEM200A	CHI3L1	-
PLCD1	TMEM163	-
FYN	TACSTD2	-
UACA	CXCL17	-
PDIA5	SPOCK1	-
IFIT5	PLA2G12B	-
PBXIP1	NKAIN4	-
HPSE	C1QL1	-
HCN4	CD109	-
EPHX1	VASN	-
MARVELD1	PCSK2	-
ACAA2	MXRA8	-
POU2F3	ERP27	-
PLIN2	BRINP1	-
TRIM14	CLDN10	-
IGDCC4	COMP	-
KLF5	DHRS3	-
TMEM220	ELF3	-
TTYH2	MISP	-
LINC00886	ESPN	-
MAPK13	CYP1B1	-
BCAS4	ALPL	-
ST14	BHLHE40	-
TNFSF9	S100A6	-
SLC39A10	ETNK2	-
FAM110B	FSTL3	-
PON2	CDKN1A	-
NET1	DUSP5	-
PCAT18	MMP11	-
PKP2	CDH4	-
SCN2B	ECM1	-
CELF4	TGM2	-
ANXA6	TREM1	-
BANK1	GGT6	-
NPC1	SDK1	-
GRAMD1B	TMEM215	-
PIR	RSPO4	-
CD276	SLC27A6	-
SHC3	SSX1	-
HERPUD1	NMU	-
KLK6	PELI1	-
MACROD2	SCD	-
TMEM117	ERBB3	-
ALDH9A1	TMEM92	-
TAGLN2	ST6GALNAC5	-
PGM2L1	BNIPL	-
PDIA4	MIR222HG	-
MMD	CLDN2	-
EMB	MUC21	-
IRAK2	FRMD5	-
SLC43A1	LURAP1L	-
TMEM38B	CBLN1	-
NAGS	CD55	-
ZYX	LY6E	-
TGIF1	HPN	-
RARG	PLAUR	-
OLAH	TRPC5	-
EPPK1	CCL13	-
TMEM37	CTSS	-
MIDN	TRIM29	-
BLACAT1	DAPK2	-
PIANP	ALOX5	-
SYNGR1	C19orf33	-
LINC01508	WNT10A	-
IL1RL2	EBI3	-
HIP1	SFTPB	-
KLHL3	FOXQ1	-
SCPEP1	CACNG4	-
F5	TREM2	-
ZMAT4	PNP	-
KLK13	TSC22D1	-
ADCY8	CRLF1	-
AXL	SAMD11	-
TNFRSF10A	IGFL2	-
YBX3	SFTA2	-
NDRG2	TM4SF4	-
P2RY2	SEL1L3	-
RBPMS2	TMEM100	-
ME1	GAP43	-
RORC	LAMP5	-
TNFSF15	SPOCK2	-
STOM	ENTPD2	-
PTK7	LGALS1	-
EHD2	ABHD11-AS1	-
RRBP1	TNC	-
PYROXD2	ARMCX3	-
TMEM63B	KLK11	-
PDIA3	BIRC7	-
SCARB1	ANXA1	-
JPH1	C2CD4A	-
EDA2R	CEACAM6	-
GCNT4	POSTN	-
DDO	G0S2	-
CGN	INHBB	-
TUBB6	RAMP1	-
FGF2	KRT19	-
KLHDC7A	APOE	-
MYBPH	CST6	-
KL	TMEM59L	-
DAB2IP	IVL	-
KCNK17	PLEKHA4	-
ACAT1	NAPSA	-
ECHDC3	NELL2	-
ATIC	C1orf116	-
PEX11A	CRABP2	-
RIMS2	MYO1G	-
ENO2	SLPI	-
SYT11	PIWIL1	-
OCIAD2	CD1A	-
TMPRSS3	MUC1	-
GXYLT2	CST2	-
GAS6	KRT17	-
ABHD3	KLK6	-
CYB561	APOC1	-
FA2H	CCL17	-
LINC00205	CA12	-
SUSD5	CD207	-
KCNK1	MARCO	-
SMIM10	LCN6	-
MLEC	MMP7	-
KCTD15	IGFBP6	-
BNC1	SLC30A2	-
NOX4	HS6ST2	-
ATP10A	COL8A2	-
MAPRE2	COL1A1	-
SLC16A4	HLA-G	-
ATP1B3	HLA-DQB2	-
KNSTRN	CTHRC1	-
RAI14	AQP5	-
ZNRF2	SPP1	-
ADAMTS14	SFTPA1	-
CD70	CCL18	-
PPP1R13L	CXCL14	-
TMEM178A	-	-
MSMO1	-	-
NFIA	-	-
SYT1	-	-
TCERG1L-AS1	-	-
F2RL1	-	-
CEP170B	-	-
TNFAIP8	-	-
ODC1	-	-
ABCC8	-	-
PYGM	-	-
KLF16	-	-
SLC25A37	-	-
RHOU	-	-
AGRN	-	-
ACRBP	-	-
BMP8A	-	-
VAT1	-	-
BSPRY	-	-
RSPH1	-	-
GPR27	-	-
SLC27A4	-	-
APOA1	-	-
CDIP1	-	-
PLA2G4F	-	-
ADIPOR2	-	-
TRO	-	-
KLC3	-	-
WWOX	-	-
CPT1A	-	-
DCBLD2	-	-
CACNA1H	-	-
VGLL1	-	-
FAM111A	-	-
USP2	-	-
MTURN	-	-
PROSER2	-	-
CLDN7	-	-
SH3BP2	-	-
RAB15	-	-
CTSD	-	-
PPIF	-	-
SEC11C	-	-
NUDT16	-	-
MEX3A	-	-
RAI2	-	-
AC008940.1	-	-
HMGN5	-	-
AVPI1	-	-
PROSER2-AS1	-	-
KIAA1324	-	-
CHST14	-	-
LMNA	-	-
TMEM150C	-	-
GAB2	-	-
ACACB	-	-
GNAZ	-	-
ETV1	-	-
RILPL1	-	-
BMP8B	-	-
ITGB5	-	-
TOMM34	-	-
MAPKAPK3	-	-
RBPMS-AS1	-	-
MPZL3	-	-
PAIP2B	-	-
ST6GALNAC3	-	-
SEMA4G	-	-
WNT3	-	-
ABR	-	-
MCTP2	-	-
DCLK2	-	-
FAM117A	-	-
FHOD3	-	-
YIPF1	-	-
SH3PXD2B	-	-
C4orf47	-	-
PEBP1	-	-
PRSS1	-	-
CLCNKA	-	-
LSR	-	-
UBE2E2	-	-
SLC29A4	-	-
ACSM5	-	-
MTHFD1L	-	-
NUDT17	-	-
IRAK1	-	-
WNT4	-	-
SEMA4C	-	-
ACAD8	-	-
ANKRD37	-	-
FAM3C	-	-
CD82	-	-
SH2D4A	-	-
SLC46A3	-	-
MREG	-	-
SYNPO	-	-
TNFRSF10B	-	-
PPIB	-	-
PXMP4	-	-
PRTFDC1	-	-
APTR	-	-
MGAT4C	-	-
DOCK3	-	-
CBLN4	-	-
PLEC	-	-
FBN2	-	-
STK39	-	-
PKM	-	-
SGIP1	-	-
CRELD1	-	-
C11orf95	-	-
WLS	-	-
IFNE	-	-
NT5DC3	-	-
GTF2IRD1	-	-
ADCY9	-	-
MYCL	-	-
RILPL2	-	-
MGST1	-	-
VWA5A	-	-
STK26	-	-
CMBL	-	-
PAPSS1	-	-
FAM181A	-	-
CENPV	-	-
PRRG4	-	-
FADS2	-	-
PPM1H	-	-
SLC25A33	-	-
SHISA4	-	-
ALDH4A1	-	-
PORCN	-	-
SSTR3	-	-
QDPR	-	-
MYH14	-	-
TSPAN13	-	-
RNF183	-	-
CD58	-	-
TLN2	-	-
IVD	-	-
CXXC5	-	-
EPHX3	-	-
LUCAT1	-	-
PSORS1C1	-	-
NLN	-	-
TEAD4	-	-
LINC00881	-	-
SPIRE2	-	-
SLC2A4	-	-
RNF150	-	-
ACSS1	-	-
SLC2A1	-	-
MPC1	-	-
KLHL2	-	-
JAZF1	-	-
PNMA1	-	-
RASAL1	-	-
PREX2	-	-
PRSS16	-	-
MEGF6	-	-
PACSIN3	-	-
PRICKLE2	-	-
SFXN3	-	-
FCGRT	-	-
CD200	-	-
BDH1	-	-
NAP1L5	-	-
CEBPG	-	-
KCTD14	-	-
MTMR7	-	-
SLC39A11	-	-
GALNT12	-	-
WASF1	-	-
BAIAP2	-	-
INSL3	-	-
SPATS2L	-	-
CYP27B1	-	-
THOC5	-	-
PIFO	-	-
CMTM8	-	-
ADCY1	-	-
LDHB	-	-
FAM53B	-	-
PITPNC1	-	-
MCF2L-AS1	-	-
NAV1	-	-
GSDMA	-	-
POLI	-	-
DRAXIN	-	-
AC012462.1	-	-
CLIP2	-	-
PRDX1	-	-
GOLGA8M	-	-
RASGEF1A	-	-
AKT2	-	-
GPR160	-	-
STX3	-	-
MARCKSL1	-	-
IL23A	-	-
PTGFRN	-	-
IGBP1	-	-
OPLAH	-	-
LAMA5	-	-
MXI1	-	-
FAM83G	-	-
SPAG5	-	-
PARD6B	-	-
TMEM217	-	-
FNDC5	-	-
FLVCR2	-	-
UBXN10	-	-
LACTB2	-	-
EPS8L2	-	-
SERPINB8	-	-
CTF1	-	-
RAP1GAP2	-	-
DSC3	-	-
PLRG1	-	-
CLN5	-	-
ULBP1	-	-
OSGIN1	-	-
KSR1	-	-
ERBB2	-	-
ZNF319	-	-
RNF39	-	-
SLITRK4	-	-
CDADC1	-	-
APBA2	-	-
SIGLEC6	-	-
DCUN1D3	-	-
ZNF860	-	-
DUSP14	-	-
DNAJB11	-	-
FUCA1	-	-
CSRP2	-	-
KY	-	-
OSGIN2	-	-
BRINP2	-	-
AK4	-	-
CRTC1	-	-
VIPR1	-	-
CABLES1	-	-
BTG3	-	-
LOH12CR2	-	-
SKIL	-	-
FAM218A	-	-
EFHC2	-	-
MAP6	-	-
ARF6	-	-
RTCA-AS1	-	-
MTMR4	-	-
OSBPL10	-	-
UBB	-	-
AR	-	-
MAGI2-AS3	-	-
ANKRD9	-	-
FAM83A	-	-
FAM201A	-	-
MEAF6	-	-
SMAD6	-	-
LY75	-	-
PRKCA	-	-
CNTFR	-	-
DOCK5	-	-
C3orf33	-	-
FAM81A	-	-
FAM114A1	-	-
ANKRD46	-	-
GLDN	-	-
TUSC1	-	-
C3orf18	-	-
FGFRL1	-	-
ZBED3	-	-
PDP1	-	-
KIF5A	-	-
GTF3C1	-	-
PNPLA4	-	-
CAMK2D	-	-
ITPKC	-	-
LINC01586	-	-
ZMYND12	-	-
MAPK8IP1	-	-
TMEM38A	-	-
LNP1	-	-
COX8A	-	-
GRB14	-	-
MAP1A	-	-
NRSN2-AS1	-	-
EFNA1	-	-
IDH1	-	-
SNX8	-	-
TXNL1	-	-
PPP1R3C	-	-
GPR155	-	-
PLXNA3	-	-
SRPRB	-	-
ZBTB42	-	-
CFL2	-	-
FLII	-	-
MDH1B	-	-
SNPH	-	-
ESRRA	-	-
RDH11	-	-
ZNF22	-	-
MYO1E	-	-
TPBG	-	-
CCDC148	-	-
ARHGEF26	-	-
SLC6A20	-	-
TMEM229B	-	-
TDRKH	-	-
ADK	-	-
FBXO10	-	-
AC139887.4	-	-
TNFRSF1A	-	-
TANGO2	-	-
AC026202.3	-	-
C6orf132	-	-
ARL4A	-	-
ROR1	-	-
PKP4	-	-
L3MBTL4	-	-
LDLRAD3	-	-
SAT1	-	-
CLDN23	-	-
BAZ1A	-	-
PHF13	-	-
TCTA	-	-
SLC18B1	-	-
GPT2	-	-
FAAH2	-	-
RAI1	-	-
IFNLR1	-	-
TMSB15A	-	-
CYCS	-	-
DIRAS1	-	-
SLC25A20	-	-
KRT8	-	-
RAB11FIP4	-	-
SLC2A13	-	-
C20orf96	-	-
MYCN	-	-
B3GNT9	-	-
MARVELD3	-	-
SQLE	-	-
DHRS7	-	-
MAPRE3	-	-
KRT18	-	-
SUCLG1	-	-
CADPS2	-	-
ANKEF1	-	-
SCRIB	-	-
ARHGEF2	-	-
PARP8	-	-
ILVBL	-	-
POR	-	-
C8orf48	-	-
GRHL1	-	-
CTDSPL	-	-
ZNF589	-	-
NIPAL2	-	-
STXBP1	-	-
LINC00310	-	-
TEAD3	-	-
TRIM16	-	-
SLC35D2	-	-
XPA	-	-
EPB41L1	-	-
CCDC183-AS1	-	-
PPP1R3E	-	-
TMPRSS11E	-	-
VDAC3	-	-
ENAH	-	-
EBAG9	-	-
STK40	-	-
MAP3K8	-	-
TPST1	-	-
PPIC	-	-
AGTR1	-	-
KLHDC8B	-	-
FKBP4	-	-
TLCD2	-	-
LINC00847	-	-
GPR173	-	-
ARHGAP10	-	-
ANAPC13	-	-
RPRM	-	-
FXYD3	-	-
RIPK2	-	-
GLIS2	-	-
ARAP1	-	-
FDX1	-	-
CYP17A1	-	-
LMAN2L	-	-
TMEM159	-	-
ARHGEF10L	-	-
RCC1	-	-
PNPLA2	-	-
GPR161	-	-
CIB4	-	-
LMO4	-	-
RHOBTB1	-	-
AC084125.4	-	-
MAP7D1	-	-
EIF2B2	-	-
RNF43	-	-
EEF1B2	-	-
SLC25A38	-	-
MYO3B	-	-
PRPSAP1	-	-
SNRPN	-	-
BFSP1	-	-
ELOVL6	-	-
FANCE	-	-
ZSWIM4	-	-
PDK3	-	-
GFOD2	-	-
SERPINI1	-	-
ASRGL1	-	-
WASIR2	-	-
IL36RN	-	-
TRIM16L	-	-
TNKS2-AS1	-	-
CRB3	-	-
SC5D	-	-
RNF24	-	-
CTTN	-	-
PEA15	-	-
STARD4	-	-
FAM50B	-	-
HS6ST3	-	-
LGALSL	-	-
RPS4X	-	-
GMPPB	-	-
GOT1	-	-
POLD1	-	-
ACOX2	-	-
RAB6B	-	-
RBMS2	-	-
CASC1	-	-
FKBP1A	-	-
FBXO9	-	-
MIEF2	-	-
C15orf62	-	-
OR4D10	-	-
MRO	-	-
PSPH	-	-
DKK2	-	-
INPP4A	-	-
DEG, differentially expressed genes; WGCNA, weighted gene co-expression network analysis.
